# Supplementary material
Source: PubMed Central journal article supplement (PMC5679204)
Supplement: NIHMS915016-supplement-Suppl__Materials.pdf [file NIHMS915016-supplement-Suppl__Materials.pdf]

# Supplementary Materials for

## **The Matricellular Protein TSP1 Promotes Human and Mouse Endothelial Cell Senescence through CD47 and Nox1**

Daniel N. Meijles<sup>1,2</sup>, †, Sanghamitra Sahoo<sup>1,2</sup>, Imad Al Ghoul<sup>1,2,4</sup>, Jefferson H. Amaral<sup>1,2</sup>, Raquel Bienes-Martinez<sup>1</sup>, Heather E. Knupp<sup>1</sup>, Shireen Attaran<sup>2</sup>, John C. Sembrat<sup>1,2</sup>, Seyed M. Nouraie<sup>3</sup>, Mauricio M. Rojas<sup>1,3</sup>, Enrico M. Novelli<sup>1</sup>, Mark T. Gladwin<sup>1,3</sup>, Jeffrey S. Isenberg<sup>1,2,3</sup>, Eugenia Cifuentes-Pagano<sup>1,2</sup>, and Patrick J. Pagano<sup>1,2\*</sup>

\*Corresponding author. Email: [pagano@pitt.edu](mailto:pagano@pitt.edu) (PJP)

### **This PDF file includes:**

Figure S1: TSP1 is increased in aging human lung vasculature and reduces endothelial cell proliferation.

Figure S2: Age-dependent changes in abundance of senescence markers in mice.

Figure S3: TSP1 does not induce endothelial cell apoptosis.

Figure S4: The TSP1-CD47 axis selectively regulates Nox1.

Figure S5: Nox1 influences cell cycle progression and senescence.

Figure S6: Age-dependent changes in abundance of Nox isoforms in human and mice lung samples.

Table S1: Characteristics of pulmonary disease-free human samples.

Table S2: Cause of death and existence of non-pulmonary diseases of the human samples.

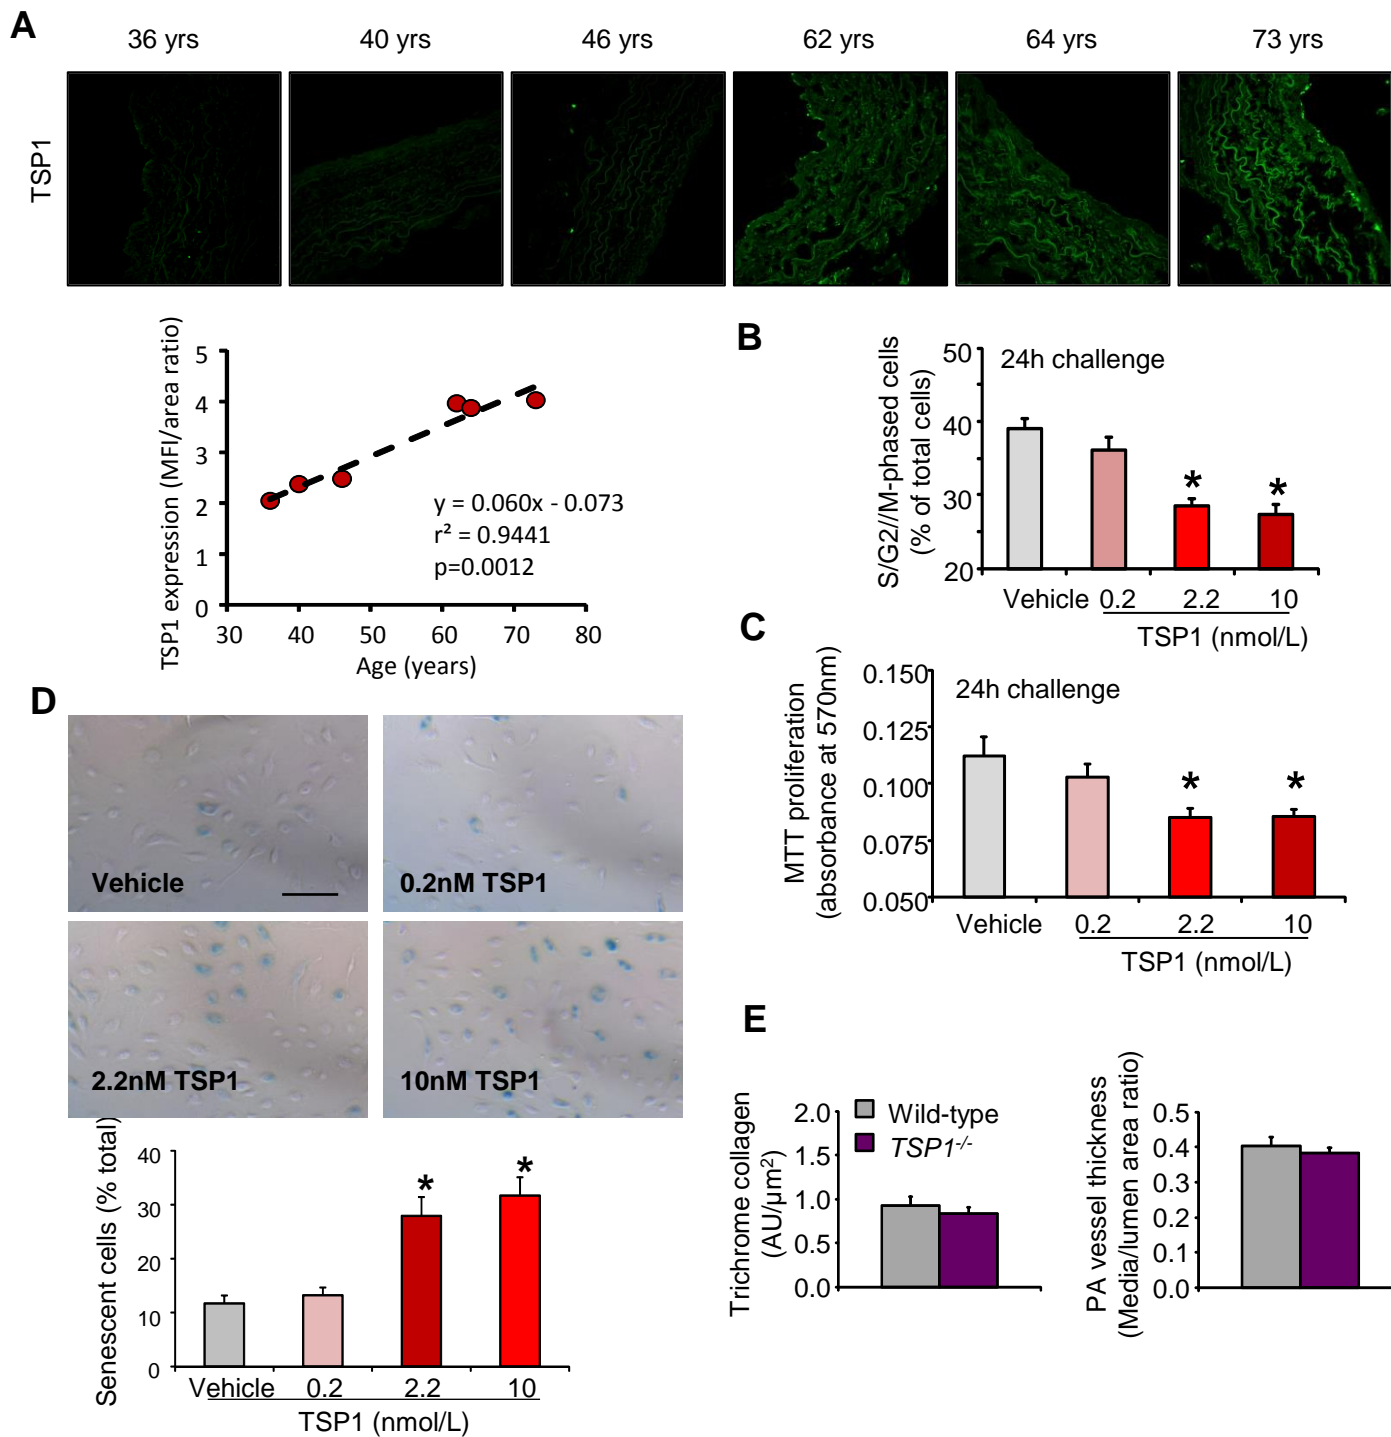

**Supplementary Figure S1: TSP1 is increased in aging human lung vasculature and reduces endothelial cell proliferation.** (A) Representative TSP1 abundance in control disease-free human pulmonary artery specimens detected by immunofluorescence (upper panels), measurements of fluorescence intensity (MFI) by ImageJ are plotted as linear regression, equation,  $r^2$  and  $p$  values are indicated in the graph (lower panel). (B and C) TSP1 at concentrations of 2.2 and 10 nmol/L inhibit HPAEC cell cycle progression characterized by decreased percent of cells in S/G2/M phases by propidium iodide labeling and FACS (B), and proliferation measured using an ELISA plate-based MTT protocol (C). Data are mean  $\pm$  SEM ( $n=4$  [B] or 3 [C]), \* $p<0.05$  compared to vehicle control by one-way ANOVA. (D) TSP1 at concentrations of 2.2 and 10 nmol/L promotes HPAEC senescence detected by SA-beta-Gal assay. Bar graph data are mean  $\pm$  SEM ( $n=3$ ), \* $p<0.05$  compared to vehicle control by one-way ANOVA. (E) *TSP1*<sup>-/-</sup> does not alter pulmonary artery vessel collagen (left panel) or thickness (right panel) compared to wild-type controls at middle age. Data are mean  $\pm$  SEM ( $n=3$  animals/12 images per group).

**A**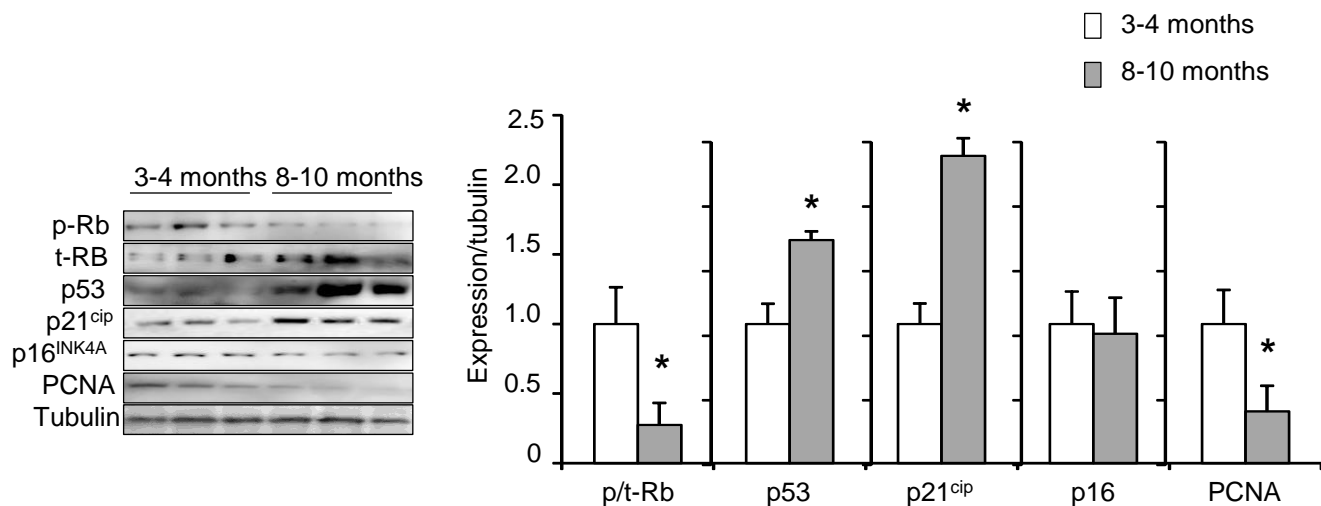**B**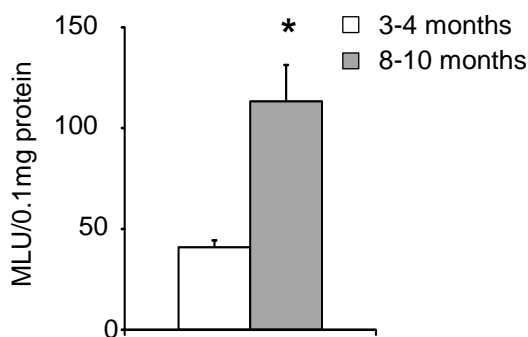**C**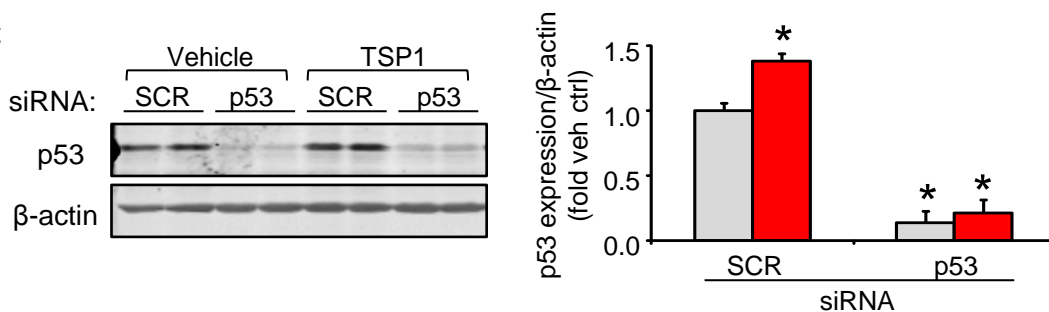

**Supplementary Figure S2: Age-dependent changes in abundance of senescence markers in mice. (A)**

Confirmation that murine aging at middle age increases tissue senescence, consistent with increased p53 and p21<sup>cip</sup> and decreased Rb phosphorylation and PCNA abundance, with p16<sup>INK4A</sup> amounts unaffected (Western blot). Graphs are mean  $\pm$  SEM (n=6), \*p<0.05 compared to vehicle control by Students *t*-test for each protein. (B) Murine aging increases superoxide production in wild-type animals assayed by lucigenin-enhanced chemiluminescence at middle age. Data are mean  $\pm$  SEM (n=6); \*p<0.05 compared to vehicle control by Students *t*-test. (C) p53 siRNA knockdown efficiency in HPAEC in the presence of vehicle or TSP1 (2.2 nmol/L; 24h). Left panels: representative Western blots for total-p53 and beta-actin. Right panel: quantitative analysis of p53 expression; data are mean  $\pm$  SEM (n=3). \*p<0.05 compared to scrambled siRNA (SCR) control by one-way ANOVA.

**A**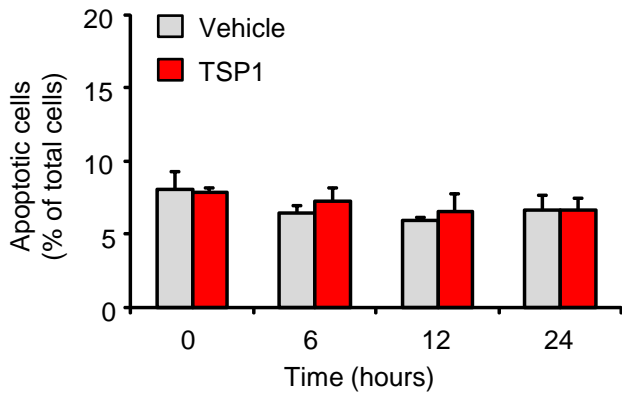**B**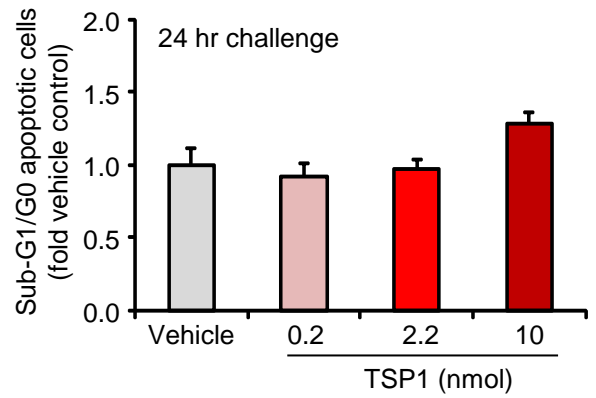

**Supplementary Figure S3: TSP1 does not induce endothelial cell apoptosis.** (A and B) TSP1 does not induce HPAEC apoptosis under the current experimental conditions at 2.2nmol/L measured kinetically using trypan-blue inclusion assay (A) or dose-dependently by FACS analysis (B). Data are mean  $\pm$  SEM (n=3).

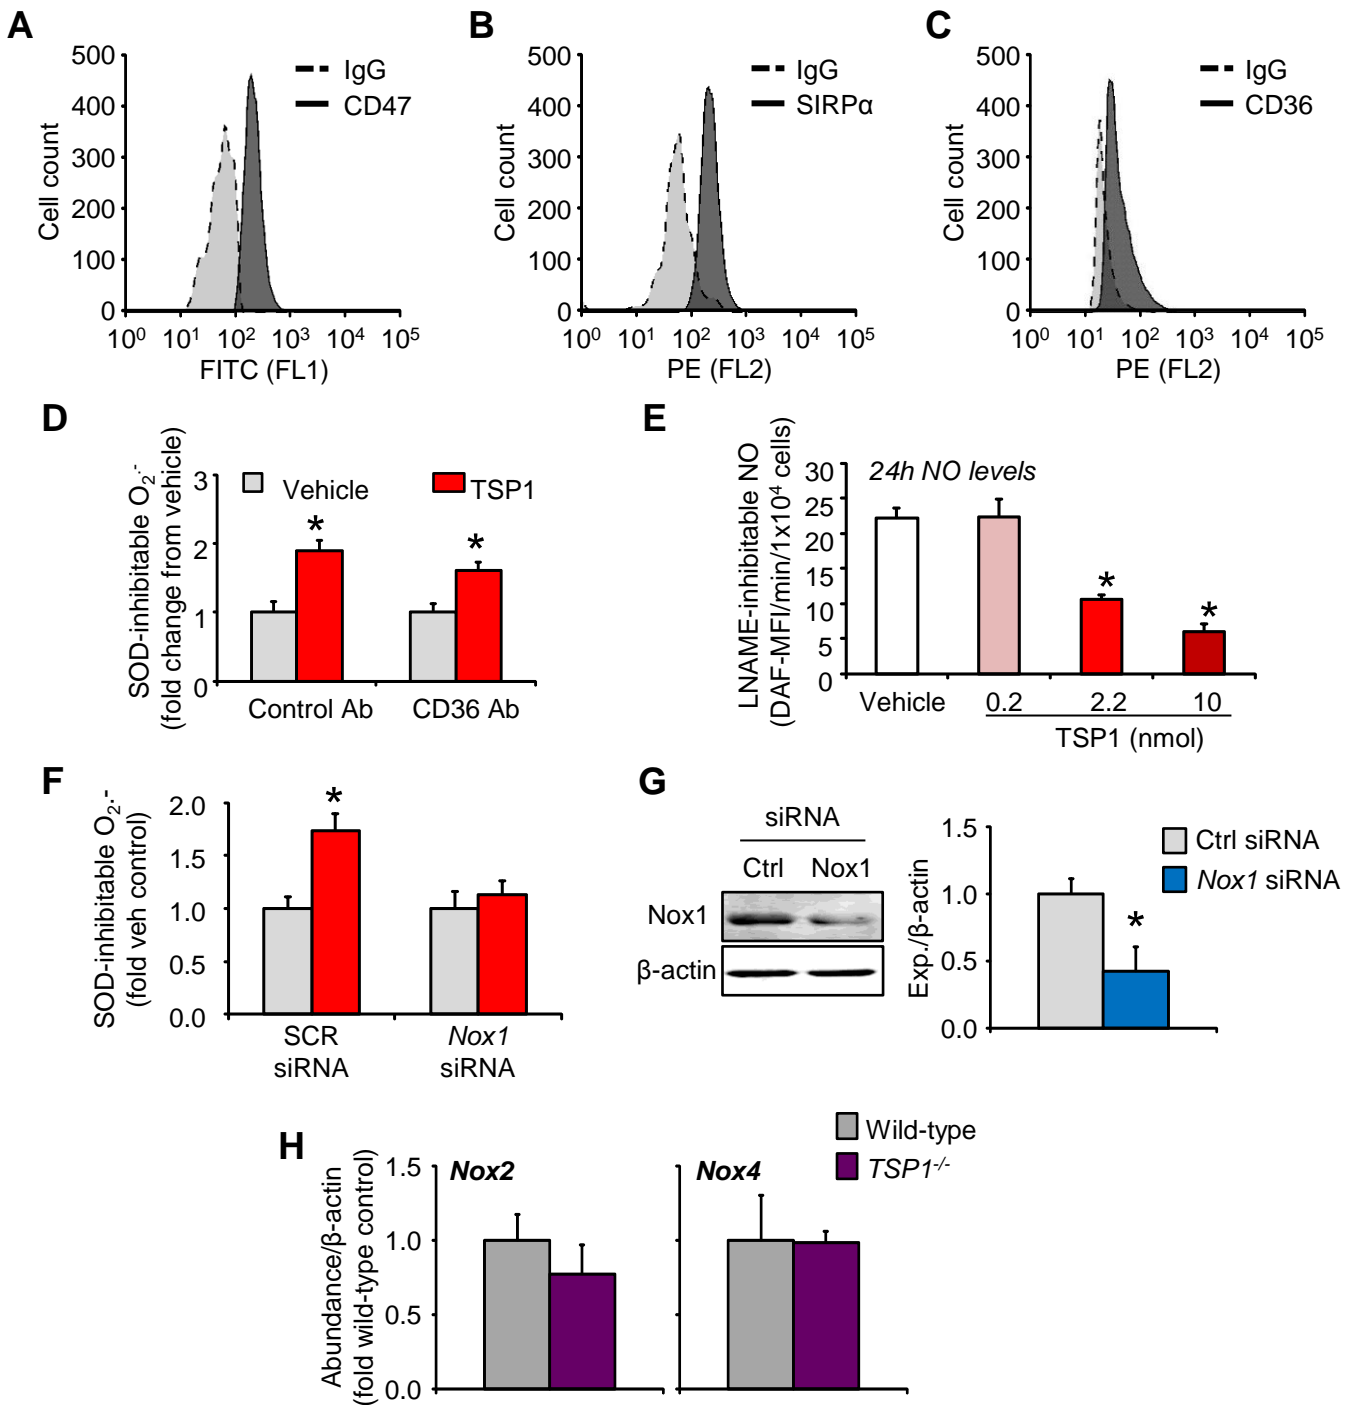

**Supplementary Figure S4: The TSP1-CD47 axis selectively regulates Nox1.** Comparative HPAEC abundance of (A) CD47, (B) SIRP- $\alpha$  and (C) CD36 measured by FACS. Histograms are representative of 3 experiments with 10,000 events recorded per detection. (D) CD36 blockade did not inhibit TSP1 induced O<sub>2</sub><sup>-</sup> production in HPAECs as measured by cytochrome c reduction. Data are mean  $\pm$  SEM (n=3 biological replicates per treatment), \*p<0.05 compared to vehicle treated controls by one-way ANOVA. (E) Effect of TSP1 (24hr) challenge on L-NAME-inhibitable NO production in HPAECs as measured by DAF fluorescence (MFI, mean intensity fluorescence) using a fluorescence plate reader. Data are mean  $\pm$  SEM (n=3 biological replicates per treatment), \*p<0.05 compared to vehicle treated controls by one-way ANOVA. (F) *Nox1* gene silencing siRNA inhibits TSP1-induced HPAEC O<sub>2</sub><sup>-</sup>. Data are mean  $\pm$  SEM (n=3 biological replicates per treatment), \*p<0.05 for TSP1 challenge compared to vehicle control by one-way ANOVA. (G) Confirmation of Nox1 knockdown efficiency in HPAECs measured by Western blot. Data are mean  $\pm$  SEM (n=3 biological replicates per treatment), \*p<0.05 compared to control siRNA by Students *t*-test. (H) The abundance of Nox2 and Nox4 in middle-aged wild-type and TSP1<sup>-/-</sup> mice lungs measured by Western blot, normalized to  $\beta$ -actin. Data are mean  $\pm$  SEM (n=6 mice per group).

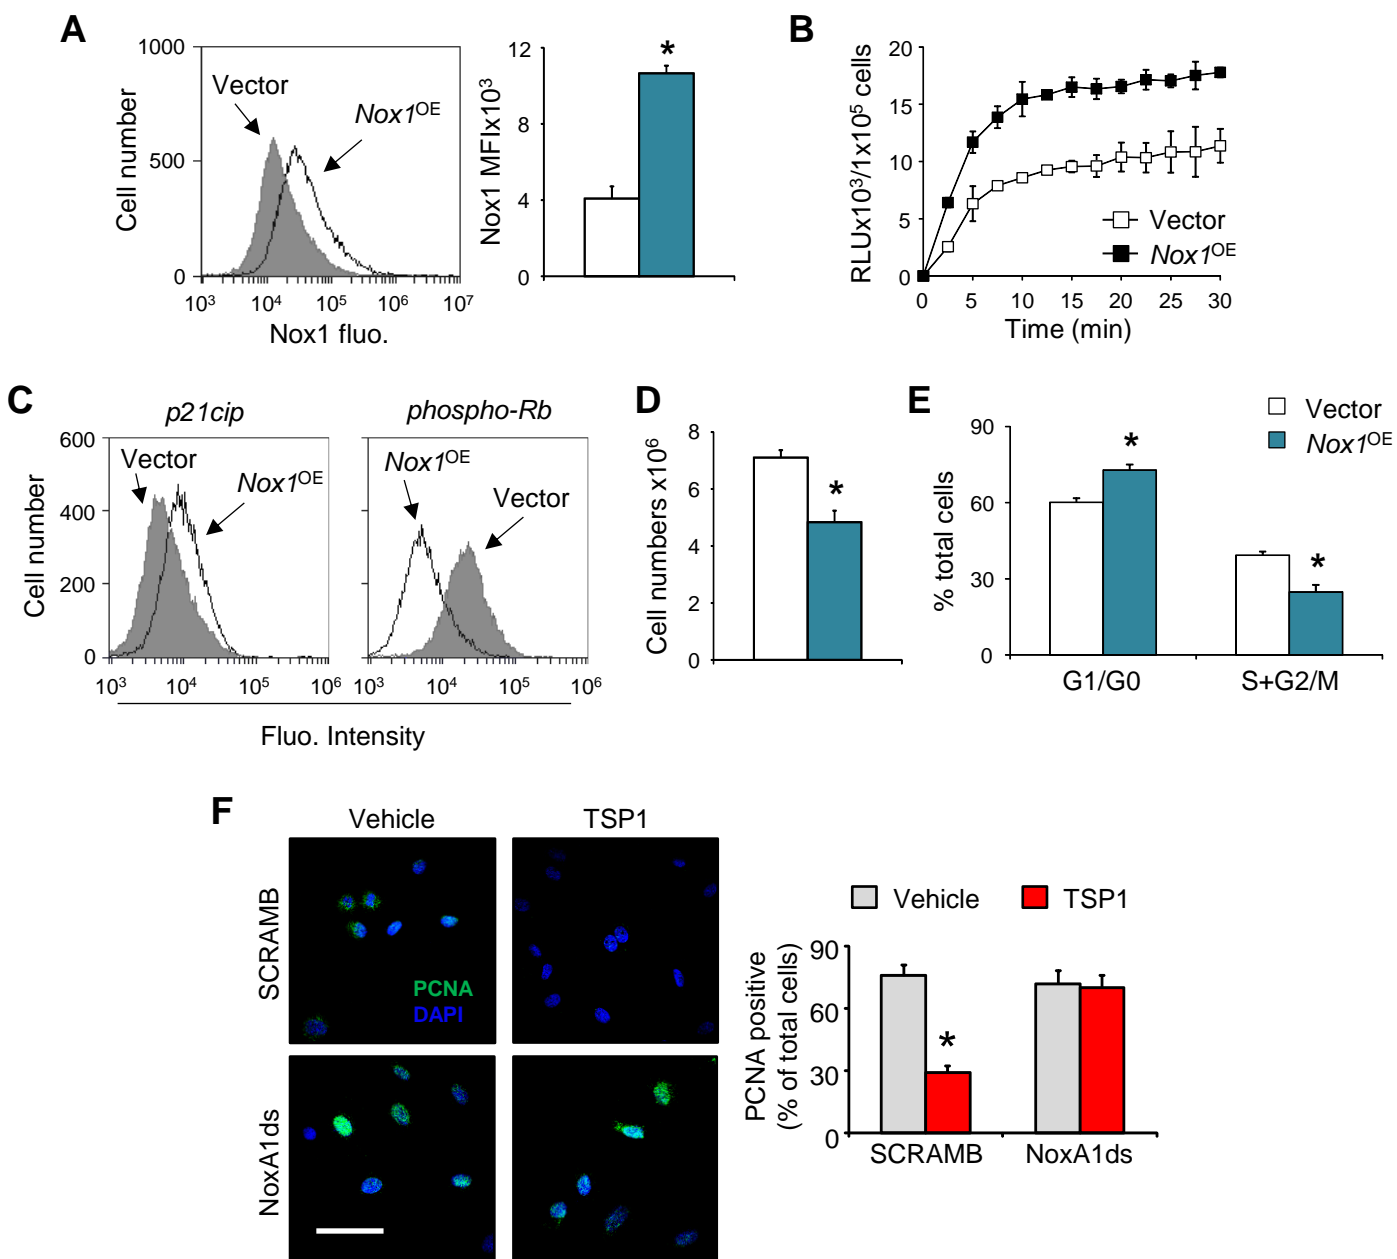

**Supplementary Figure S5: Nox1 influences cell cycle progression and senescence.** Human Nox1 overexpression (*Nox1*<sup>OE</sup>) of HPAEC confirmed by FACS detection. Data are mean ± SEM (n=3), \*p<0.05 compared to vector controls by Students *t*-test. (B) Nox1 overexpression increases O<sub>2</sub><sup>-</sup> generation in intact ECs detected by lucigenin-chemiluminescence. Data are mean ± SEM (n=3). (C) Nox1 overexpression increases p21<sup>cip</sup> and decreases Rb phosphorylation detected by FACS labelling. Images are representative of 3 independent experiments. (D) Nox1 overexpression decreases EC proliferation assessed by trypan-blue exclusion assay. Data are mean ± SEM (n=3), \*p<0.05 compared to vector controls - Students *t*-test. (E) Nox1 overexpression decreases cell cycle progression detected by propidium iodide-FACS labelling. Data are mean ± SEM (n=3), \*p<0.05 compared to vector controls by Students *t*-test for each phase. (F) Treatment of HPAEC with NoxA1ds reverses TSP1-induced decrease in PCNA expression as assessed by immunofluorescence (PCNA, green; DAPI, blue). Data are mean ± SEM (n=3; 12-20 images per group; scale bar: 10µm); \*p<0.05 for TSP1 challenge versus SCRAMB vehicle control by one-way ANOVA.

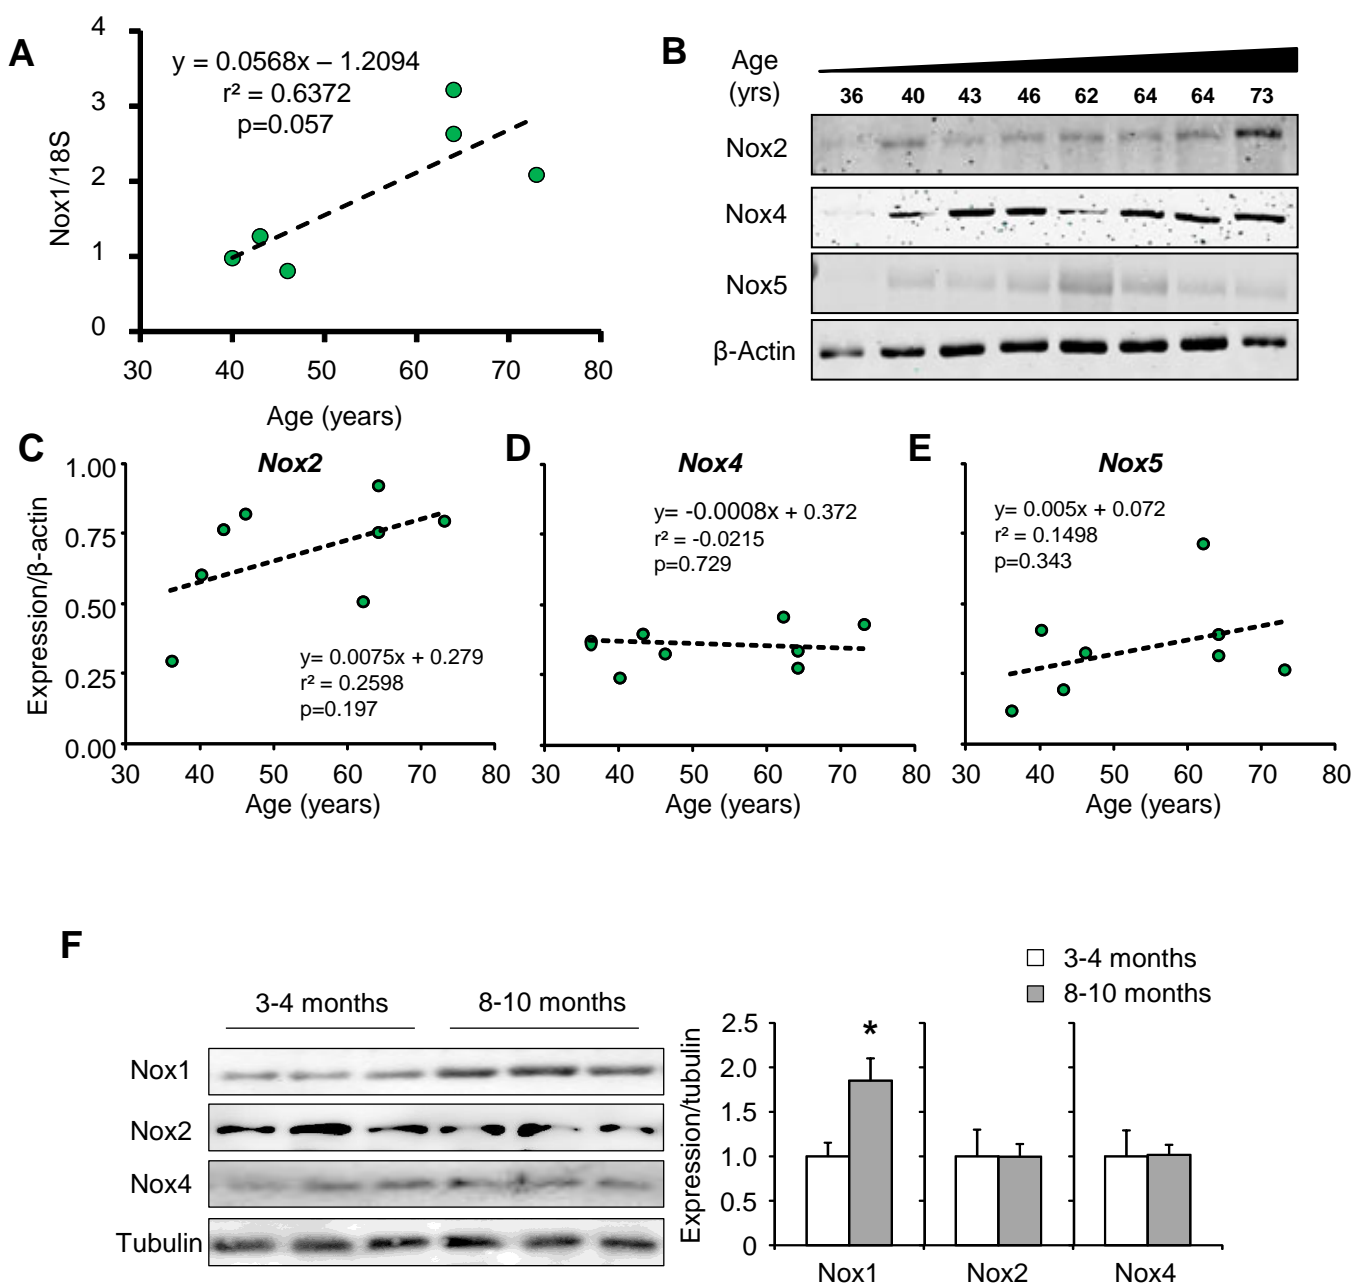

**Supplementary Figure S6: Age-dependent changes in abundance of Nox isoforms in human and mouse lung samples.** (A) Expression of *Nox1* mRNA significantly correlated with age in human lung homogenates as quantified by qRT-PCR. (B - E) Expression of Nox2, Nox4 and Nox5 protein in lungs of humans of various ages (B) normalized to beta-actin (C-E) as assessed by Western blot. Data are plotted as linear regression and equation,  $r^2$  and  $p$  values are indicated in the corresponding graphs. (F) Expression of Nox1, Nox2 and Nox4 protein in aging murine lungs assessed by Western blot (left panels) normalized to alpha-tubulin (right panels). Data are mean  $\pm$  SEM ( $n=6$ ); \* $p < 0.05$  compared to vector controls by Students  $t$ -test for each protein.

**Supplementary Table 1:** Characteristics of pulmonary disease-free human samples.

| Parameter                   | <50 yrs (n=4) | >50 yrs (n=4) |
|-----------------------------|---------------|---------------|
| Mean age (SEM)              | 41.25 ± 2.13  | 65.75 ± 2.46  |
| Range (years)               | 36 - 46 (10)  | 62 - 73 (11)  |
| Male gender (%)             | 100           | 50            |
| Smoking history             | 1/4           | 0/4           |
| Av BMI (kg/m <sup>2</sup> ) | 31.0 ± 1.6    | 32.3 ± 3.3    |

**Supplementary Table 2:** Cause of death and existence of non-pulmonary diseases of the human samples.

|                        | Number (>50 yrs) |
|------------------------|------------------|
| Stroke                 | 4/8 (3/4)        |
| Blunt trauma           | 4/8 (1/4)        |
| Systemic hypertension* | 4/8 (3/4)        |
| Diabetes*              | 2/8 (1/4)        |
|                        |                  |
